# Supplementary material for: The protective effect of Moringa oleifera plant extract against glutamate-induced DNA damage and reduced cell viability in a primary retinal ganglion cell line
Source: PeerJ. 2021 Jun 22;9:e11569. doi: 10.7717/peerj.11569 (PMC8231317; doi:10.7717/peerj.11569)
Supplement: Supplemental Information 1 [file peerj-09-11569-s001.xlsx]

## Sheet: Sheet1
					Tailed	Untailed	Tail length	Tail DNA	Tail Moment
					%	%	µm	%	Unit
			M. oleifera--5/5	1	3	97	1.35	1.15	1.55
			M. oleifera--5/5	2	5	95	1.28	1.23	1.57
			M. oleifera--5/5	3	4	96	1.33	1.37	1.82
			M. oleifera--5/10	4	3	97	1.41	1.32	1.86
			M. oleifera--5/10	5	4	96	1.38	1.51	2.08
			M. oleifera--5/10	6	5	95	1.44	1.26	1.81
			M. oleifera--5/50	7	4	96	1.59	1.41	2.24
			M. oleifera--5/50	8	3	97	1.62	1.33	2.15
			M. oleifera--5/50	9	3	97	1.52	1.41	2.14
			M. oleifera--5/100	10	7	93	2.13	1.95	4.15
			M. oleifera--5/100	11	9	91	2.22	2.04	4.53
			M. oleifera--5/100	12	7	93	2.05	2.07	4.24
					Tailed	Untailed	Tail length	Tail DNA	Tail Moment
					%	%	µm	%	Unit
			GLUT/5	1	4	96	1.44	1.69	2.43
			GLUT/5	2	6	94	1.69	1.92	3.24
			GLUT/5	3	6	94	1.58	1.88	2.97
			GLUT/10	4	9	91	1.88	1.95	3.67
			GLUT/10	5	8	92	2.28	1.99	4.54
			GLUT/10	6	9	91	1.92	2.16	4.15
			GLUT/50	7	21	79	3.05	2.92	8.91
			GLUT/50	8	18	82	3.33	3.05	10.16
			GLUT/50	9	21	79	3.69	3.22	11.88
			GLUT/100	10	25	75	4.15	3.19	13.24
			GLUT/100	11	30	70	4.92	4.15	20.42
			GLUT/100	12	28	72	4.79	4.22	20.21
					Tailed	Untailed	Tail length	Tail DNA	Tail Moment
					%	%	µm	%	Unit
			M. oleifera--5(50)+Glut (100 )	13	16	84	3.28	3.21	10.53
			M. oleifera--5(50)+Glut (100 )	14	17	83	3.34	3.05	10.19
			M. oleifera--5(50)+Glut (100 )	15	16	84	3.04	3.31	10.06
					Tailed	Untailed	Tail length	Tail DNA	Tail Moment
					%	%	µm	%	Unit
			M. oleifera--5(100)+Glut (100 )	13	14	86	2.88	2.87	8.27
			M. oleifera--5(100)+Glut (100 )	14	15	85	2.57	3.16	8.12
			M. oleifera--5(100)+Glut (100 )	15	15	85	3.24	2.92	9.46
				Viability
			Control	1
			Control	1
			Control	1
			M. oleifera--5/5	1
			M. oleifera--5/5	0.95
			M. oleifera--5/5	0.97
			M. OleiferA--5/10	0.94
			M. oleiferA--5/10	0.95
			M. oleifera--5/10	0.93
			M. oleifera--5/50	0.88
			M. Oleifera--5/50	0.82
			M. Oleifera--5/50	0.85
			M. Oleifera--5/100	0.77
			M. oleifera--5/100	0.79
			M. oleifera--5/100	0.81
				Viability
			GLUT/5	0.94
			GLUT/5	0.95
			GLUT/5	0.92
			GLUT/10	0.85
			GLUT/10	0.83
			GLUT/10	0.86
			GLUT/50	0.77
			GLUT/50	0.75
			GLUT/50	0.77
			GLUT/100	0.59
			GLUT/100	0.6
			GLUT/100	0.55
			M. OLEIFERA--5(50)+Glut (100 )
			M. OLEIFERA--5(50)+Glut (100 )
			M. OLEIFERA--5(50)+Glut (100 )
			M. OLEIFERA--5(50)+Glut (100 )
			M. OLEIFERA--5(50)+Glut (100 )
			M. OLEIFERA--5(50)+Glut (100 )
