# Supplementary material for: The protective effect of Moringa oleifera plant extract against glutamate-induced DNA damage and reduced cell viability in a primary retinal ganglion cell line
Source: PeerJ. 2021 Jun 22;9:e11569. doi: 10.7717/peerj.11569 (PMC8231317; doi:10.7717/peerj.11569)
Supplement: Supplemental Information 2 [file peerj-09-11569-s002.xlsx]

## Sheet: Sheet1
		25			50			100			500
	1	0.082	0.088	0.112	0.118	0.116	0.121	0.122	0.12	0.114	0.112	0.123	0.093	490
		0.085 / 36%			0.115 / 14%			0.121 / 9 %			0.118 / 11%
	3	0.104	0.11	0.123	0.125	0.124	0.126	0.127	0.124	0.122	0.123	0.118	0.116	490
		0.107 / 20%			0.125 / 6 %			0.123 / 8 %			0.119
	4	0.116	0.12	0.125	0.117	0.124	0.12	0.101	0.081	0.075	0.113	0.115	0.114	490
		0.12			0.12			0.086			0.114
	5	0.12	0.121	0.129	0.121	0.123	0.128	0.092	0.122	0.121	0.105	0.103	0.102	490
		0.123			0.124			0.112			0.103
	6	0.113	0.122	0.123	0.122	0.123	0.124	0.122	0.122	0.127	0.115	0.114	0.11	490
		0.119			0.123			0.124			0.113
	7	0.097	0.135	0.132	0.12	0.123	0.138	0.121	0.126	0.103	0.064	0.116	0.117	490
		0.134			0.127			0.117			0.116
	butylated hydroxytoluene (BHT)	0.065	0.081	0.057	0.049	0.057	0.046	0.046	0.044	0.042	0.045	0.047	0.046	490
	Blank	0.079	0.109	0.133	0.039	0.052	0.034	0.04	0.044	0.044	0.037	0.035	0.037	490
		0.133
